# Supplementary material
Source: PubMed Central journal article supplement (PMC4497759)
Supplement: JCI80025sd.pdf [file JCI80025sd.pdf]

**Supplemental Table 1.** Individual and mean VLDL apoB pool size (PS), fractional clearance (FCR) and production rates (PR) during treatments.

|                 | VLDL       |            |                                 |                                 |                   |                   |
|-----------------|------------|------------|---------------------------------|---------------------------------|-------------------|-------------------|
|                 | PS<br>(mg) | PS<br>(mg) | FCR <sup>a</sup><br>(pools/day) | FCR <sup>b</sup><br>(pools/day) | PR<br>(mg/kg/day) | PR<br>(mg/kg/day) |
| Panel A Subject | Period 1   | Period 2   | Period 1                        | Period 2                        | Period 1          | Period 2          |
| 1               | 38         | 53         | 27.44                           | 14.73                           | 14.51             | 10.80             |
| 2               | 245        | 214        | 5.90                            | 6.94                            | 16.34             | 16.84             |
| 3               | 295        | 202        | 4.72                            | 11.21                           | 15.71             | 25.02             |
| 4               | 148        | 163        | 6.53                            | 5.71                            | 12.34             | 12.12             |
| 5               | 178        | 127        | 8.73                            | 10.98                           | 17.59             | 15.81             |
| 6               | 167        | 115        | 4.53                            | 5.98                            | 10.37             | 9.71              |
| 7               | 55         | 44         | 11.94                           | 9.21                            | 11.71             | 7.05              |
| 8               | 283        | 109        | 4.55                            | 8.01                            | 13.32             | 9.23              |
| 9               | 165        | 178        | 5.67                            | 7.23                            | 10.21             | 14.08             |
| 10              | 122        | 107        | 5.83                            | 8.85                            | 8.13              | 10.84             |
| 11              | 354        | 336        | 4.07                            | 4.10                            | 15.94             | 15.84             |
| 12              | 255        | 142        | 5.10                            | 10.42                           | 14.96             | 17.02             |
| 13              | 209        | 124        | 5.53                            | 6.23                            | 10.97             | 7.31              |
| 14              | 196        | 91         | 4.72                            | 5.31                            | 16.02             | 8.39              |
| 15              | 309        | 191        | 3.78                            | 20.81                           | 11.39             | 37.55             |
| 16              | 119        | 90         | 10.09                           | 19.89                           | 12.03             | 18.52             |
| 17              | 105        | 87         | 7.80                            | 15.86                           | 10.21             | 17.06             |
| 18              | 174        | 121        | 6.30                            | 7.56                            | 12.96             | 9.83              |
| 19              | 213        | 241        | 12.18                           | 7.41                            | 45.11             | 32.33             |
| 20              | 192        | 100        | 7.03                            | 11.17                           | 13.25             | 10.85             |
| 21              | 199        | 140        | 6.24                            | 8.66                            | 12.78             | 12.48             |
| 22              | 531        | 438        | 6.66                            | 4.73                            | 29.96             | 18.07             |
| 23              | 212        | 285        | 20.07                           | 15.37                           | 44.63             | 44.96             |
| 24              | 384        | 139        | 9.02                            | 8.05                            | 34.43             | 11.85             |
| 25              | 131        | 61         | 8.40                            | 28.23                           | 13.30             | 20.20             |
| 26              | 487        | 269        | 6.26                            | 9.67                            | 23.52             | 20.20             |
| 27              | 210        | 291        | 6.20                            | 7.16                            | 18.29             | 28.94             |
| 28              | 111        | 115        | 8.77                            | 13.69                           | 9.55              | 15.59             |
| 29              | 371        | 99         | 5.47                            | 11.15                           | 18.73             | 10.44             |
|                 |            |            |                                 |                                 |                   |                   |

| Panel B Subject | Period 1 | Period 2 | Period 1 | Period 2 | Period 1 | Period 2 |
|-----------------|----------|----------|----------|----------|----------|----------|
| 1               | 135      | 155      | 4.19     | 5.51     | 7.54     | 11.38    |
| 2               | 146      | 104      | 12.92    | 14.17    | 21.74    | 17.02    |
| 3               | 164      | 269      | 6.36     | 5.44     | 9.45     | 13.68    |
| 4               | 97       | 154      | 6.91     | 7.68     | 10.29    | 17.88    |
| 5               | 243      | 143      | 4.67     | 8.76     | 12.44    | 13.80    |
| 6               | 160      | 171      | 4.98     | 5.52     | 11.21    | 13.33    |
| 7               | 365      | 218      | 4.62     | 12.21    | 19.50    | 31.42    |
| 8               | 279      | 280      | 6.76     | 6.96     | 19.39    | 20.52    |
| 9               | 117      | 156      | 11.10    | 31.15    | 24.93    | 92.67    |
| 10              | 204      | 189      | 4.51     | 6.86     | 12.43    | 17.52    |

**Supplemental Table 2.** Individual and mean IDL apoB pool size (PS), fractional clearance (FCR) and production rates (PR) during treatments.

|                 | IDL        |            |                                 |                                 |                   |                   |
|-----------------|------------|------------|---------------------------------|---------------------------------|-------------------|-------------------|
|                 | PS<br>(mg) | PS<br>(mg) | FCR <sup>a</sup><br>(pools/day) | FCR <sup>b</sup><br>(pools/day) | PR<br>(mg/kg/day) | PR<br>(mg/kg/day) |
| Panel A Subject | Period 1   | Period 2   | Period 1                        | Period 2                        | Period 1          | Period 2          |
| 1               | 73         | 38         | 2.02                            | 4.50                            | 2.07              | 2.35              |
| 2               | 108        | 81         | 5.76                            | 6.91                            | 7.02              | 6.34              |
| 3               | 140        | 92         | 3.43                            | 6.08                            | 5.41              | 6.18              |
| 4               | 87         | 81         | 5.87                            | 7.25                            | 6.49              | 7.67              |
| 5               | 130        | 124        | 3.17                            | 2.36                            | 4.67              | 3.30              |
| 6               | 140        | 79         | 2.71                            | 3.60                            | 5.18              | 4.02              |
| 7               | 18         | 22         | 10.90                           | 6.75                            | 3.48              | 2.64              |
| 8               | 150        | 45         | 5.34                            | 5.09                            | 8.28              | 2.43              |
| 9               | 79         | 55         | 5.11                            | 7.19                            | 4.41              | 4.34              |
| 10              | 122        | 58         | 5.26                            | 7.12                            | 7.33              | 4.71              |
| 11              | 184        | 87         | 6.25                            | 10.51                           | 12.74             | 10.54             |
| 12              | 138        | 78         | 3.87                            | 5.81                            | 5.72              | 5.20              |
| 13              | 188        | 96         | 4.53                            | 4.30                            | 8.10              | 3.91              |
| 14              | 119        | 48         | 3.74                            | 7.51                            | 7.72              | 6.32              |
| 15              | 203        | 134        | 3.13                            | 4.40                            | 6.22              | 5.58              |
| 16              | 85         | 20         | 4.44                            | 7.53                            | 3.78              | 1.59              |
| 17              | 68         | 32         | 5.47                            | 9.89                            | 4.60              | 3.87              |
| 18              | 27         | 3          | 6.03                            | 5.13                            | 1.93              | 0.18              |
| 19              | 43         | 35         | 3.57                            | 4.45                            | 2.69              | 2.84              |
| 20              | 7          | 12         | 6.85                            | 7.44                            | 0.49              | 0.87              |
| 21              | 38         | 28         | 5.12                            | 13.89                           | 2.01              | 4.06              |
| 22              | 151        | 83         | 2.94                            | 4.33                            | 3.78              | 3.14              |
| 23              | 134        | 93         | 13.74                           | 9.06                            | 19.23             | 8.64              |
| 24              | 130        | 23         | 3.62                            | 8.54                            | 4.67              | 2.11              |
| 25              | 113        | 26         | 4.07                            | 4.81                            | 5.56              | 1.49              |
| 26              | 100        | 56         | 5.12                            | 1.02                            | 3.97              | 0.44              |
| 27              | 23         | 46         | 8.21                            | 6.24                            | 2.70              | 3.96              |
| 28              | 13         | 11         | 7.27                            | 8.38                            | 0.95              | 0.90              |
| 29              | 23         | 5          | 6.63                            | 5.61                            | 1.40              | 0.28              |
|                 |            |            |                                 |                                 |                   |                   |

| Panel B Subject | Period 1 | Period 2 | Period 1 | Period 2 | Period 1 | Period 2 |
|-----------------|----------|----------|----------|----------|----------|----------|
| 1               | 169      | 70       | 2.43     | 3.91     | 5.46     | 3.64     |
| 2               | 106      | 79       | 8.79     | 7.94     | 10.75    | 7.21     |
| 3               | 60       | 126      | 6.25     | 5.46     | 3.40     | 6.46     |
| 4               | 96       | 79       | 3.65     | 7.13     | 5.34     | 8.57     |
| 5               | 171      | 181      | 4.28     | 6.36     | 8.01     | 12.65    |
| 6               | 80       | 80       | 3.74     | 3.84     | 4.20     | 4.32     |
| 7               | 153      | 66       | 2.47     | 4.06     | 4.35     | 3.18     |
| 8               | 123      | 75       | 4.86     | 3.77     | 6.16     | 2.98     |
| 9               | 78       | 72       | 2.85     | 6.79     | 4.31     | 9.35     |
| 10              | 99       | 44       | 2.35     | 4.51     | 3.14     | 2.68     |

**Supplemental Table 3.** Individual and mean LDL apoB pool size (PS), fractional clearance (FCR) and production rates (PR) during treatments.

|                 | LDL        |            |                                 |                                 |                   |                   |
|-----------------|------------|------------|---------------------------------|---------------------------------|-------------------|-------------------|
|                 | PS<br>(mg) | PS<br>(mg) | FCR <sup>a</sup><br>(pools/day) | FCR <sup>b</sup><br>(pools/day) | PR<br>(mg/kg/day) | PR<br>(mg/kg/day) |
| Panel A Subject | Period 1   | Period 2   | Period 1                        | Period 2                        | Period 1          | Period 2          |
| 1               | 2126       | 1512       | 0.46                            | 0.53                            | 13.63             | 10.96             |
| 2               | 2592       | 2089       | 0.65                            | 0.65                            | 19.04             | 15.44             |
| 3               | 2133       | 1747       | 0.49                            | 0.78                            | 11.84             | 15.17             |
| 4               | 2123       | 1813       | 0.43                            | 0.51                            | 11.61             | 12.12             |
| 5               | 2134       | 1539       | 0.45                            | 0.56                            | 10.94             | 9.74              |
| 6               | 1711       | 1450       | 0.35                            | 0.46                            | 8.23              | 9.44              |
| 7               | 816        | 842        | 0.62                            | 0.67                            | 8.90              | 9.93              |
| 8               | 2174       | 2126       | 0.59                            | 0.49                            | 13.29             | 11.04             |
| 9               | 1850       | 1500       | 0.45                            | 0.62                            | 9.04              | 10.18             |
| 10              | 2431       | 1701       | 0.36                            | 0.53                            | 9.84              | 10.25             |
| 11              | 2298       | 1920       | 0.40                            | 0.55                            | 10.23             | 12.13             |
| 12              | 1875       | 1655       | 0.69                            | 0.51                            | 14.94             | 9.78              |
| 13              | 2363       | 2493       | 0.56                            | 0.40                            | 12.62             | 9.56              |
| 14              | 1326       | 1027       | 0.48                            | 0.58                            | 10.96             | 10.38             |
| 15              | 3242       | 3937       | 0.34                            | 0.36                            | 10.86             | 13.49             |
| 16              | 3296       | 1449       | 0.43                            | 1.13                            | 14.26             | 16.98             |
| 17              | 2341       | 1602       | 0.36                            | 0.88                            | 10.51             | 17.38             |
| 18              | 3252       | 3763       | 0.35                            | 0.25                            | 13.41             | 10.17             |
| 19              | 1459       | 1217       | 0.38                            | 0.50                            | 9.62              | 11.12             |
| 20              | 3461       | 2180       | 0.36                            | 0.52                            | 12.23             | 11.02             |
| 21              | 2694       | 1905       | 0.36                            | 0.64                            | 9.88              | 12.48             |
| 22              | 3813       | 2439       | 0.35                            | 0.65                            | 11.21             | 13.73             |
| 23              | 3183       | 2763       | 0.23                            | 0.92                            | 7.70              | 26.17             |
| 24              | 2372       | 1936       | 0.54                            | 0.70                            | 12.79             | 14.38             |
| 25              | 3578       | 3432       | 0.29                            | 0.23                            | 12.46             | 9.43              |
| 26              | 3679       | 3139       | 0.45                            | 0.42                            | 12.87             | 10.24             |
| 27              | 2608       | 2083       | 0.46                            | 0.56                            | 16.70             | 16.04             |
| 28              | 2991       | 2613       | 0.33                            | 0.60                            | 9.67              | 15.52             |
| 29              | 4037       | 3255       | 0.45                            | 0.34                            | 16.88             | 10.48             |
|                 |            |            |                                 |                                 |                   |                   |

| Panel B Subject | Period 1 | Period 2 | Period 1 | Period 2 | Period 1 | Period 2 |
|-----------------|----------|----------|----------|----------|----------|----------|
| 1               | 2545     | 1940     | 0.26     | 0.40     | 8.65     | 10.24    |
| 2               | 3080     | 2631     | 0.53     | 0.44     | 18.84    | 13.46    |
| 3               | 2494     | 3017     | 0.41     | 0.49     | 9.27     | 13.96    |
| 4               | 1526     | 1462     | 0.42     | 0.79     | 9.72     | 17.42    |
| 5               | 4265     | 2962     | 0.32     | 0.56     | 15.07    | 16.44    |
| 6               | 3724     | 2430     | 0.28     | 0.39     | 14.60    | 13.35    |
| 7               | 3492     | 3158     | 0.36     | 0.38     | 14.40    | 14.04    |
| 8               | 2960     | 2626     | 0.44     | 0.41     | 13.38    | 11.28    |
| 9               | 2435     | 1550     | 0.63     | 0.64     | 29.56    | 18.87    |
| 10              | 3050     | 2534     | 0.20     | 0.28     | 8.08     | 9.65     |

**Supplemental Table 4: Concentrations of apoB-containing lipoprotein particle subspecies determined by NMR.**

|                                                | Panel A (N=29)     |                    |                                 |         | Panel B (N=10)     |                    |                                 |         | All Subjects (N=39) |                    |                                 |         |
|------------------------------------------------|--------------------|--------------------|---------------------------------|---------|--------------------|--------------------|---------------------------------|---------|---------------------|--------------------|---------------------------------|---------|
|                                                | Period 1 (ATV)     | Period 2 (MK+ATV)  | % change from Period 1 (95% CI) | p-value | Period 1 (PBO)     | Period 2 (MK)      | % change from Period 1 (95% CI) | p-value | Period 1            | Period 2           | % change from Period 1 (95% CI) | p-value |
| VLDL & Chylomicron Particles (total), (nmol/L) | 41.66<br>(53.10)   | 40.17<br>(45.13)   | -3.59<br>(-19.24, 15.09)        | 0.678   | 52.28<br>(70.61)   | 46.10<br>(45.16)   | -11.81<br>(-34.78, 19.24)       | 0.404   | 46.67<br>(57.88)    | 43.03<br>(44.98)   | -7.79<br>(-22.59, 9.83)         | 0.353   |
| Large VLDL & Chylomicrons Particles*, (nmol/L) | 0.80<br>(1.70)     | 0.50<br>(1.80)     | -25.46<br>(-57.25, 41.42)       | 0.349   | 2.05<br>(3.00)     | 0.75<br>(1.20)     | -61.53<br>(-85.71, -23.29)      | 0.014   | 0.90<br>(1.90)      | 0.60<br>(1.80)     | -39.00<br>(-62.20, -0.00)       | 0.049   |
| Medium VLDL Particles*, (nmol/L)               | 11.20<br>(14.70)   | 26.10<br>(17.90)   | 84.88<br>(40.66, 157.35)        | <.001   | 15.80<br>(19.90)   | 24.15<br>(28.60)   | 64.93<br>(13.48, 336.49)        | 0.014   | 13.10<br>(17.20)    | 26.10<br>(20.50)   | 78.68<br>(42.73, 138.85)        | <.001   |
| Small VLDL Particles*, (nmol/L)                | 30.40<br>(22.60)   | 15.60<br>(11.80)   | -50.04<br>(-65.43, -33.43)      | <.001   | 39.10<br>(13.40)   | 20.85<br>(15.60)   | -48.18<br>(-75.04, -14.57)      | 0.027   | 32.10<br>(25.10)    | 17.90<br>(13.60)   | -51.47<br>(-63.91, -35.08)      | <.001   |
| IDL Particles*, (nmol/L)                       | 28.00<br>(47.00)   | 3.50<br>(0.00)     | -77.95<br>(-86.25, -58.89)      | <.001   | 65.00<br>(48.00)   | 3.50<br>(34.50)    | -78.82<br>(-93.51, -20.80)      | 0.020   | 32.00<br>(63.00)    | 3.50<br>(0.00)     | -78.13<br>(-85.99, -65.84)      | <.001   |
| LDL Particles (total)*, (nmol/L)               | 980.00<br>(237.00) | 570.00<br>(229.00) | -44.71<br>(-52.76, -34.08)      | <.001   | 1417.00<br>(72.00) | 702.50<br>(635.00) | -43.51<br>(-60.49, -16.75)      | 0.010   | 1109.00<br>(456.00) | 599.00<br>(393.00) | -44.70<br>(-52.31, -35.35)      | <.001   |
| Large LDL Particles, (nmol/L)                  | 318.00<br>(53.71)  | 331.85<br>(46.43)  | 4.36<br>(-13.43, 25.80)         | 0.647   | 323.10<br>(57.38)  | 366.44<br>(33.54)  | 13.41<br>(-17.49, 55.90)        | 0.428   | 320.54<br>(53.80)   | 348.71<br>(43.18)  | 8.79<br>(-9.54, 30.83)          | 0.361   |
| Medium Small LDL Particles*, (nmol/L)          | 127.00<br>(77.00)  | 50.00<br>(80.00)   | -68.70<br>(-87.66, -47.24)      | <.001   | 215.50<br>(42.00)  | 51.50<br>(129.00)  | -70.33<br>(-95.79, -36.31)      | 0.010   | 160.00<br>(95.00)   | 50.00<br>(94.00)   | -69.35<br>(-87.07, -52.29)      | <.001   |
| Small LDL Particles (total)*, (nmol/L)         | 649.00<br>(317.00) | 175.00<br>(329.00) | -75.02<br>(-86.89, -60.29)      | <.001   | 986.00<br>(213.00) | 276.50<br>(692.00) | -75.21<br>(-94.25, -29.07)      | 0.010   | 730.00<br>(424.00)  | 175.00<br>(411.00) | -75.13<br>(-85.39, -62.74)      | <.001   |
| Very Small LDL Particles*, (nmol/L)            | 522.00<br>(249.00) | 152.00<br>(266.00) | -81.20<br>(-94.37, -60.58)      | <.001   | 789.00<br>(151.00) | 225.00<br>(552.00) | -77.08<br>(-94.75, -27.27)      | 0.010   | 570.00<br>(338.00)  | 152.00<br>(329.00) | -80.00<br>(-92.70, -63.14)      | <.001   |

Abbreviations: atorvastatin (ATV), anacetrapib (MK), placebo (PBO)

Mixed model analysis performed on log scale for the endpoints that satisfy normality. Geometric Mean (% CV) displayed under Period 1 and Period 2. Geometric Mean Ratio (95% CI) displayed under % Change from baseline.

\*Non-parametric method used. Median (IQR) on raw scale displayed under Period 1 and Period 2. Hodges-Lehmann estimate (95% CI) back transformed from log scale displayed under % Change from baseline. p-value from Wilcoxon signed rank test.

Treatment corresponding to Panel A Period 1: 20 mg ATV + PBO to anacetrapib.

Treatment corresponding to Panel A Period 2: 20 mg ATV + 100 mg anacetrapib.

Treatment corresponding to Panel B Period 1: PBO to ATV + PBO to anacetrapib.

Treatment corresponding to Panel B Period 2: PBO to ATV + 100 mg anacetrapib.

**Supplemental Table 5.** Individual and mean PCSK9 pool size (PS), fractional clearance (FCR) and production rates (PR) during treatments.

|                 | PCSK9      |            |                                 |                                 |                   |                   |
|-----------------|------------|------------|---------------------------------|---------------------------------|-------------------|-------------------|
|                 | PS<br>(mg) | PS<br>(mg) | FCR <sup>a</sup><br>(pools/day) | FCR <sup>b</sup><br>(pools/day) | PR<br>(mg/kg/day) | PR<br>(mg/kg/day) |
| Panel A Subject | Period 1   | Period 2   | Period 1                        | Period 2                        | Period 1          | Period 2          |
| 1               | 928        | 1095       | 3.78                            | 2.55                            | 49.14             | 39.05             |
| 2               | 986        | 969        | 2.09                            | 1.88                            | 23.20             | 20.84             |
| 3               | 908        | 833        | 2.56                            | 2.18                            | 26.87             | 20.60             |
| 4               | 925        | 862        | 1.65                            | 2.09                            | 19.80             | 23.33             |
| 5               | 1230       | 1809       | 2.06                            | 1.84                            | 28.49             | 37.15             |
| 6               | 785        | 846        | 1.58                            | 1.32                            | 17.51             | 15.44             |
| 7               | 555        | 581        | 1.32                            | 2.07                            | 13.05             | 21.28             |
| 8               | 921        | 1060       | 1.30                            | 1.35                            | 12.68             | 14.97             |
| 9               | 815        | 904        | 1.92                            | 1.84                            | 16.78             | 17.96             |
| 10              | 648        | 824        | 1.02                            | 0.83                            | 7.49              | 7.84              |
| 11              | 656        | 666        | 1.69                            | 1.76                            | 12.33             | 13.53             |
| 12              | 1270       | 1343       | 2.27                            | 1.84                            | 33.27             | 28.27             |
| 13              | 2092       | 1601       | 1.77                            | 1.35                            | 34.95             | 20.51             |
| 14              | 872        | 972        | 1.97                            | 1.98                            | 31.15             | 34.43             |
| 15              | 2236       | 2356       | 2.07                            | 1.63                            | 45.53             | 37.46             |
| 16              | 1068       | 1445       | 2.41                            | 3.85                            | 27.32             | 55.80             |
| 17              | 800        | 603        | 2.03                            | 1.74                            | 19.58             | 13.03             |
| 18              | 1033       | 1398       | 2.22                            | 1.40                            | 25.43             | 23.10             |
| 19              | 610        | 717        | 2.16                            | 2.68                            | 22.33             | 33.40             |
| 20              | 841        | 946        | 1.32                            | 1.49                            | 11.14             | 13.82             |
| 21              | 1297       | 1249       | 1.83                            | 1.77                            | 23.90             | 22.70             |
| 22              | 1228       | 1186       | 2.13                            | 1.75                            | 23.16             | 17.60             |
| 23              | 932        | 944        | 2.03                            | 1.83                            | 19.41             | 18.08             |
| 24              | 684        | 1000       | 1.72                            | 1.44                            | 11.74             | 14.36             |
| 25              | 634        | 865        | 1.84                            | 1.62                            | 14.38             | 16.92             |
| 26              | 839        | 841        | 1.70                            | 2.02                            | 11.12             | 13.17             |
| 27              | 622        | 635        | 1.98                            | 2.24                            | 17.26             | 20.03             |
| 28              | 963        | 1061       | 1.85                            | 2.09                            | 17.34             | 21.84             |
| 29              | 940        | 791        | 1.49                            | 1.59                            | 12.81             | 11.61             |
|                 |            |            |                                 |                                 |                   |                   |



| Panel B Subject | Period 1 | Period 2 | Period 1 | Period 2 | Period 1 | Period 2 |
|-----------------|----------|----------|----------|----------|----------|----------|
| 1               | 749      | 909      | 3.90     | 2.28     | 38.82    | 27.77    |
| 2               | 1202     | 1426     | 2.76     | 2.39     | 38.33    | 39.77    |
| 3               | 1113     | 1053     | 1.23     | 2.42     | 12.69    | 23.98    |
| 4               | 450      | 679      | 1.89     | 2.67     | 13.19    | 27.86    |
| 5               | 1035     | 1182     | 1.27     | 1.95     | 14.38    | 25.74    |
| 6               | 864      | 565      | 1.56     | 1.50     | 19.18    | 11.97    |
| 7               | 605      | 504      | 2.32     | 2.46     | 16.34    | 14.37    |
| 8               | 635      | 588      | 1.84     | 1.92     | 12.41    | 11.60    |
| 9               | 669      | 443      | 1.17     | 1.77     | 14.29    | 15.13    |
| 10              | 463      | 313      | 1.28     | 1.72     | 8.33     | 7.29     |
